# Supplementary material
Source: PubMed Central journal article supplement (PMC5108197)

Title: *Potentially Preventable Hospitalization among Patients with Chronic Kidney Disease and High Inpatient Use*

**Supplemental File**

Appendix 1. ICD-9-CM and ICD-10 diagnostic coding schemes to define co-morbidity among study participants.

Appendix 2. Clinical and demographic factors associated with high use of inpatient services among patients with CKD

Appendix 1. ICD-9-CM and ICD-10 diagnostic coding schemes to define co-morbidity among study participants. (Table adapted from Tonelli et al. 2015<sup>28</sup>)

| <b>Morbidity</b>                                                             | <b>Algorithm</b>                                            | <b>ICD-9 CM</b>                                                                                                                                                                                                 | <b>ICD-10</b>                                                                                                                                                                                      |
|------------------------------------------------------------------------------|-------------------------------------------------------------|-----------------------------------------------------------------------------------------------------------------------------------------------------------------------------------------------------------------|----------------------------------------------------------------------------------------------------------------------------------------------------------------------------------------------------|
| <b>Alcohol misuse</b>                                                        | 1 hospitalization or 2 claims in 2 years or less            | 265.2, 291.1–291.3, 291.5–291.9, 303.0, 303.9, 305.0, 357.5, 425.5, 535.3, 571.0–571.3, 980, V11.3                                                                                                              | E52, F10, G62.1, I42.6, K29.2, K70.0, K70.3, K70.9, T51, Z50.2, Z71.4, Z72.1                                                                                                                       |
| <b>Asthma</b>                                                                | 1 hospitalization or 3 ACCS in 2 years or less              | 493                                                                                                                                                                                                             | J45                                                                                                                                                                                                |
| <b>Atrial fibrillation</b>                                                   | 1 hospitalization or 2 claims in 2 years or less            | 427.3 <sup>&amp;</sup>                                                                                                                                                                                          | I48.0                                                                                                                                                                                              |
| <b>Cancer, lymphoma</b>                                                      | 1 hospitalization or 2 claims in 2 years or less            | 200–202, 203.0, 238.6                                                                                                                                                                                           | C81–C85, C88, C90.0, C90.2, C96                                                                                                                                                                    |
| <b>Cancer, metastatic</b>                                                    | 1 hospitalization or 2 claims in 2 years or less            | 196–199                                                                                                                                                                                                         | C77–C80                                                                                                                                                                                            |
| <b>Cancer, non-metastatic (breast, cervical, colorectal, lung, prostate)</b> | 1 hospitalization or 2 claims in 2 years or less            | 153-154, 162-163, 174, 180, 185, 230.3-230.6, 231.2, 233.0-233.1, 233.4                                                                                                                                         | C18-C21, C33-C34, C38.4, C45.0, C46.71, C50, C53, C61, D01.0-D01.3, D02.2, D05-D06, D07.5                                                                                                          |
| <b>Chronic heart failure</b>                                                 | 1 hospitalization or 2 claims in 2 years or less            | 398.91, 402.01, 402.11, 402.91, 404.01, 404.03, 404.11, 404.13, 404.91, 404.93, 425.4–425.9, 428                                                                                                                | I09.9, I25.5, I42.0, I42.5–I42.9, I43, I50                                                                                                                                                         |
| <b>Chronic pain</b>                                                          | 2 hospitalizations or 2 claims or 2 ACCS in 30 days or less | 307.80, 307.89, 338.0, 338.2, 338.4, 719.41, 719.45, 719.46, 719.47, 719.49, 720.0, 720.2, 720.9, 721.0, 721.1, 721.2, 721.3, 721.4, 721.6, 721.8, 721.9, 722, 723.0, 723.1, 723.3, 723.4, 723.5, 723.6, 723.7, | F45.4, M08.1, M25.50, M25.51, M25.55, M25.56, M25.57, M43.2, M43.3, M43.4, M43.5, M43.6, M45, M46.1, M46.3, M46.4, M46.9, M47, M48.0, M48.1, M48.8, M48.9, M50.8, M50.9, M51, M53.1, M53.2, M53.3, |

|                                   |                                                                                              |                                                                                                                                               |                                                                                                                   |
|-----------------------------------|----------------------------------------------------------------------------------------------|-----------------------------------------------------------------------------------------------------------------------------------------------|-------------------------------------------------------------------------------------------------------------------|
|                                   |                                                                                              | 723.8, 723.9, 724.0,<br>724.1, 724.2, 724.3,<br>724.4, 724.5, 724.6,<br>724.70, 724.79, 724.8,<br>724.9, 729.0, 729.1,<br>729.2, 729.4, 729.5 | M53.8, M53.9, M54,<br>M60.8, M60.9, M63.3,<br>M79.0, M79.1, M79.2,<br>M79.6, M79.7, M96.1                         |
| <b>Chronic pulmonary disease</b>  | 1 hospitalization or 2 claims in 2 years or less                                             | 416.8, 416.9, 490–492,<br>494-505, 506.4, 508.1,<br>508.8                                                                                     | I27.8, I27.9, J40–J44,<br>J46-J47, J60–J67,<br>J68.4, J70.1, J70.3                                                |
| <b>Cirrhosis</b>                  | 1 hospitalization or 1 claim or 1 ACCS                                                       | 571.2, 571.5, 571.6                                                                                                                           | K70.3, K74.3, K74.4,<br>K74.5, K74.6                                                                              |
|                                   | and hepatic decompensation<br>1 hospitalization or 1 claim or 1 ACCS                         | 456.0, 456.1, 456.20,<br>456.21, 567.0, 567.2,*<br>567.21, 567.29, 567.8,<br>567.9, 572.2, 572.4,<br>789.5 Exclude 567.81,<br>567.82, 789.51  | I85.0, I85.9, I98.2,<br>I98.3, K65.0, K65.8,<br>K65.9, K67.0, K67.1,<br>K67.2, K67.3, K67.8,<br>K76.7, K93.0, R18 |
| <b>Dementia</b>                   | 1 hospitalization or 2 claims in 2 years or less                                             | 290, 294.1, 331.2                                                                                                                             | F00–F03, F05.1, G30,<br>G31.1                                                                                     |
| <b>Depression</b>                 | 1 hospitalization or 2 claims in 2 years or less                                             | 296.2, 296.3, 296.5,<br>300.4, 309, 311                                                                                                       | F20.4, F31.3–F31.5,<br>F32, F33, F34.1,<br>F41.2, F43.2                                                           |
| <b>Diabetes</b>                   | 1 hospitalization or 2 claims in 2 years or less                                             | 250                                                                                                                                           | E10-E14                                                                                                           |
| <b>Epilepsy</b>                   | 1 most responsible hospitalization or 2 claims in 2 years or less or 1 most responsible ACCS | 345                                                                                                                                           | G40-G41                                                                                                           |
| <b>Hypertension</b>               | 1 hospitalization or 2 claim in 2 years or less                                              | 401-405                                                                                                                                       | I10-I13, I15                                                                                                      |
| <b>Hypothyroidism</b>             | 1 hospitalization or 2 claims in 2 years or less                                             | 240.9, 243, 244, 246.1,<br>246.8                                                                                                              | E00–E03, E89.0                                                                                                    |
| <b>Inflammatory bowel disease</b> | 2 hospitalizations or 2 GAST or                                                              | 555, 556                                                                                                                                      | K50, K51                                                                                                          |

| GP claims in 3 years or less       |                                                                                                |                                                                                                  |                                                                                                                                            |
|------------------------------------|------------------------------------------------------------------------------------------------|--------------------------------------------------------------------------------------------------|--------------------------------------------------------------------------------------------------------------------------------------------|
| <b>Irritable bowel syndrome</b>    | 1 hospitalization without surgery or 2 claims in 2 years or less                               | 564.1 Exclude 153-154, 157, 183.0, 197.5, 198.6, 235.2, 239.0, 555-556, 571.2, 571.5, 577.1, 579 | K58 Exclude C18-C21, C25, C56, C78.5, C79.6, D01.7, D01.9, D37.1-D37.5, K50-K51, K70.2-K70.3, K74.0, K74.2, K74.6, K86.0-K86.1, K90, K91.2 |
| <b>Multiple sclerosis</b>          | 2 hospitalizations or 2 claims in 3 years or less                                              | 323, 340, 341.0, 341.9, 377.3                                                                    | G35, G36, G37, H46                                                                                                                         |
| <b>Myocardial infarction</b>       | 1 hospitalization                                                                              | 410                                                                                              | I21-I22                                                                                                                                    |
| <b>Parkinson's disease</b>         | 1 hospitalizations or 1 claim                                                                  | 332                                                                                              | G20, G21, G22                                                                                                                              |
| <b>Peptic ulcer disease</b>        | 1 hospitalization or 2 claims in 2 years or less                                               | 531.7, 531.9, 532.7, 532.9, 533.7, 533.9, 534.7, 534.9                                           | K25.7, K25.9, K26.7, K26.9, K27.7, K27.9, K28.7, K28.9                                                                                     |
| <b>Peripheral vascular disease</b> | 1 hospitalization or 1 claim or 1 ACCS                                                         | 440.2                                                                                            | I70.2                                                                                                                                      |
| <b>Psoriasis</b>                   | 1 hospitalization or 1 DERM claim                                                              | 696.1                                                                                            | L40.0, L40.1, L40.2, L40.3, L40.4, L40.8, L40.9                                                                                            |
| <b>Rheumatoid arthritis</b>        | 1 hospitalization or 2 claims in 2 years or less                                               | 446.5, 710.0-710.4, 714.0-714.2, 714.8, 725                                                      | M05, M06, M31.5, M32-M34, M35.1, M35.3, M36.0                                                                                              |
| <b>Schizophrenia</b>               | 1 hospitalization or 2 claims in 2 years or less                                               | 295                                                                                              | F20, F21, F23.2, F25                                                                                                                       |
| <b>Stroke or TIA</b>               | 1 most responsible or post-admittance hospitalization or 1 claim or 1 most responsible ED ACCS | 362.3, 430, 431, 433.x1, 434.x1, 435, 436                                                        | G45.0-G45.3, G45.8-G45.9, H34.1, I60, I61, I63, I64                                                                                        |

Supplemental File – Appendix 2. Clinical and demographic factors associated with high use of inpatient services among patients with CKD

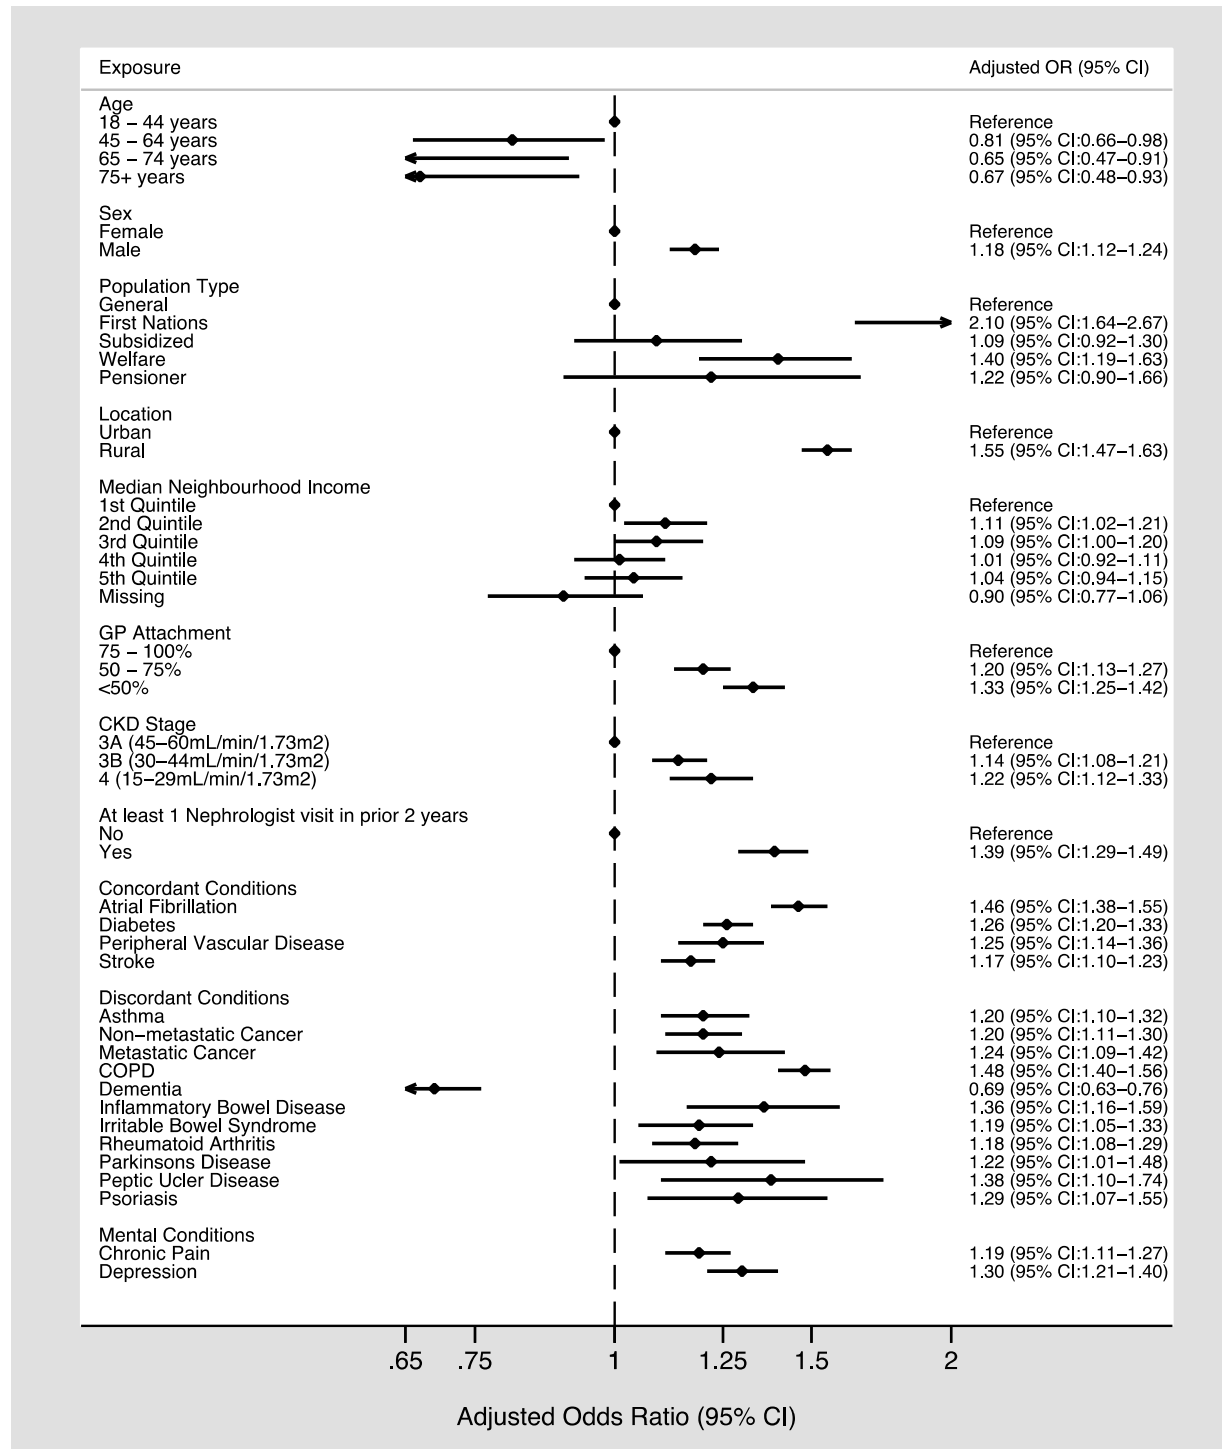

Supplement: CJN.04690416SupplementaryData.pdf [file CJN.04690416SupplementaryData.pdf]
